# Supplementary material
Source: HighWire-hosted journal article supplement (http://www.cmaj.ca/highwire/filestream/58464/field_highwire_adjunct_files/0/increased-suh-online_appendix_1.pdf)
Supplement: increased-suh-online_appendix_1.pdf [file increased-suh-online_appendix_1.pdf]

|                           |      |      |      |        |       |       |       |       |       |       |
|---------------------------|------|------|------|--------|-------|-------|-------|-------|-------|-------|
| <b>Clopidogrel</b>        |      |      |      |        |       |       |       |       |       |       |
|                           |      |      |      | 300 mg | 75 mg |
|                           |      |      |      | ↓      | ↓     | ↓     | ↓     | ↓     | ↓     | ↓     |
|                           | -3 d | -2 d | -1 d | 0 d    | 1 d   | 2 d   | 3 d   | 4 d   | 5 d   | 6 d   |
| Platelet aggregation test |      |      |      | ↑      | ↑     | ↑     |       |       |       | ↑     |

↑  
28-day washout period  
↓

|                           |      |      |      |        |       |       |       |       |       |       |
|---------------------------|------|------|------|--------|-------|-------|-------|-------|-------|-------|
| <b>Clopidogrel</b>        |      |      |      |        |       |       |       |       |       |       |
|                           |      |      |      | 300 mg | 75 mg |
|                           |      |      |      | ↓      | ↓     | ↓     | ↓     | ↓     | ↓     | ↓     |
| <b>Itraconazole</b>       | ↓    | ↓    | ↓    | ↓      |       |       |       |       |       |       |
|                           | -3 d | -2 d | -1 d | 0 d    | 1 d   | 2 d   | 3 d   | 4 d   | 5 d   | 6 d   |
| Platelet aggregation test |      |      |      | ↑      | ↑     | ↑     |       |       |       | ↑     |

**Appendix 1:** Drug regimens and platelet aggregation testing during phase 1 of the study. During this phase, the authors investigated, in volunteers, the association between cytochrome P450 (CYP) 3A5 genotype and platelet aggregation after clopidogrel administration with or without CYP3A inhibition.
